# Supplementary material
Source: publisher figshare collection journal article supplement (https://acs.figshare.com/ndownloader/files/4756369)
Supplement: Supplementary file 1 [file 4756369]

## Supporting Information

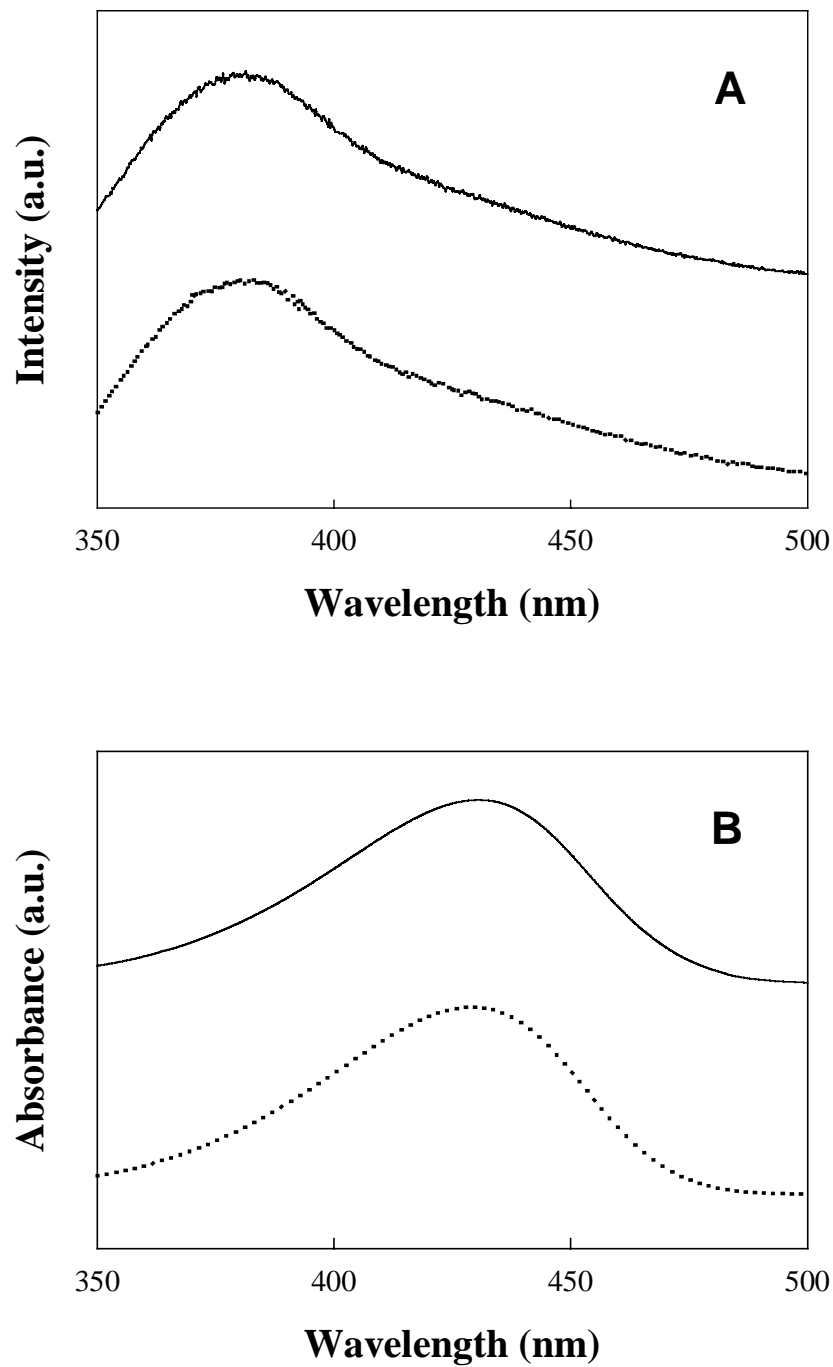

**Figure S1.** (A) Fluorescence emission spectra of **5** at pH 6.0 (solid line) and pH 7.0 (dotted line).

(B) UV-visible spectra of coumarin 343 at pH 6.0 (solid line) and pH 7.0 (dotted line).

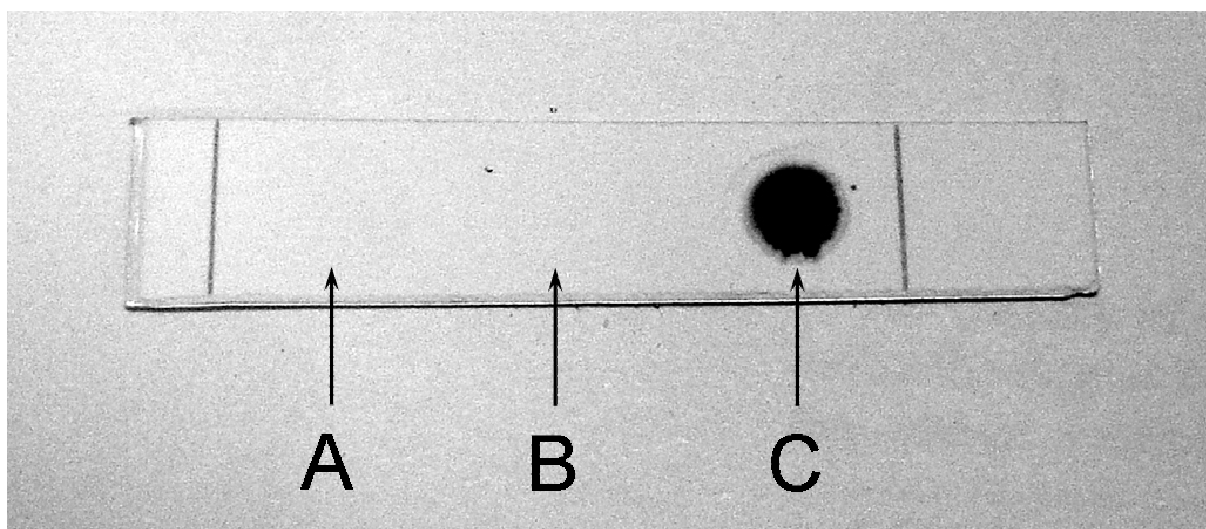

**Figure S2.** Results of Nynhidrin test are shown above. It is noted that the original color-version image was converted into the grayscale-version image: (A) Nynhidrin only; (B) Nynhidrin with **5**; (C) Nynhidrin with **6**.

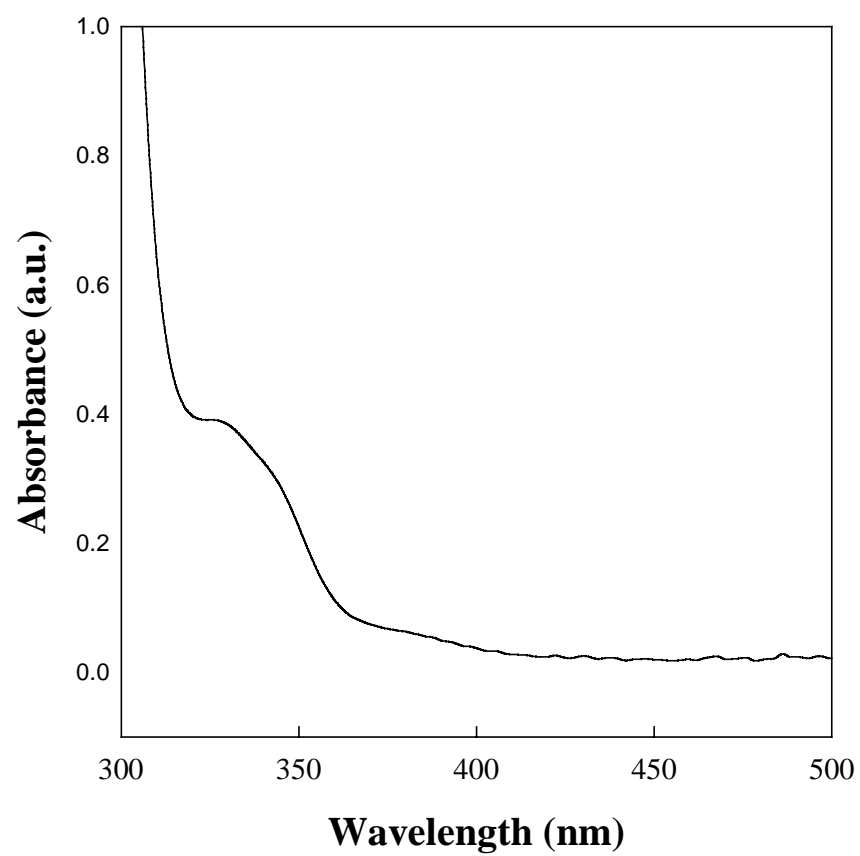

**Figure S3.** UV-visible spectrum of **6** in pH 8.0.

We estimate the Forster Critical Radius ( $R_o$  (Å)) defined as  $R_o = 9.7 \times 10^3 \left( \frac{\kappa^2 \Phi_D J}{n^4} \right)^{\frac{1}{6}}$ ,<sup>1</sup> where  $\kappa^2$ , the orientation factor, is assumed to be 2/3 for random orientation;  $n$ , the refractive index of the medium, is usually taken as 1.4 for aqueous mediums in biological studies;  $\Phi_D$ , the quantum yield of the donor in the absence of the acceptor is 0.05 when it is measured in pH 8.0 aqueous solution using an integrating sphere with He/Cd laser as the excitation light source;<sup>2</sup>  $J$ , the overlap integral, is defined as  $J = \frac{\int F(\lambda) \epsilon(\lambda) \lambda^4 d\lambda}{\int F(\lambda) d\lambda}$ , where  $F(\lambda)$  is the fluorescence of the donor in arbitrary units,  $\epsilon(\lambda)$  is the extinction coefficient of the acceptor in  $\text{cm}^{-1} \cdot \text{M}^{-1}$ , and  $\lambda$  is in  $\text{cm}$ . When the values of parameters are substituted in the Forster equation,  $R_o$  is finally estimated to be 24.3 Å (see Supporting Information page 4).

(1) Stryer, L. *Annu. Rev. Biochem.* **1978**, 47, 819.

(2) J.C. deMello. J. C., Wittmann, H. F., Friend R. H. *Adv. Mater.* **1997**, 9, 230.
